# Supplementary material for: Flood risk assessment for Indian sub-continental river basins
Source: Copernicus journal article supplement (doi:10.5194/hess-2023-73), 2023-04-04
Supplement: Supplementary file 1 [file hess-2023-73-supplement.pdf]

## Supplemental Information

# Flood risk assessment for Indian sub-continental river basins

Urmin Vegad<sup>1</sup>, Yadu Pokhrel<sup>2</sup>, and Vimal Mishra<sup>1,3\*</sup>

<sup>1</sup>Civil Engineering, Indian Institute of Technology (IIT) Gandhinagar

<sup>2</sup>Civil Engineering, Michigan State University, East Lansing

<sup>3</sup>Earth Sciences, Indian Institute of Technology (IIT) Gandhinagar

\*Corresponding author: vmishra@iitgn.ac.in

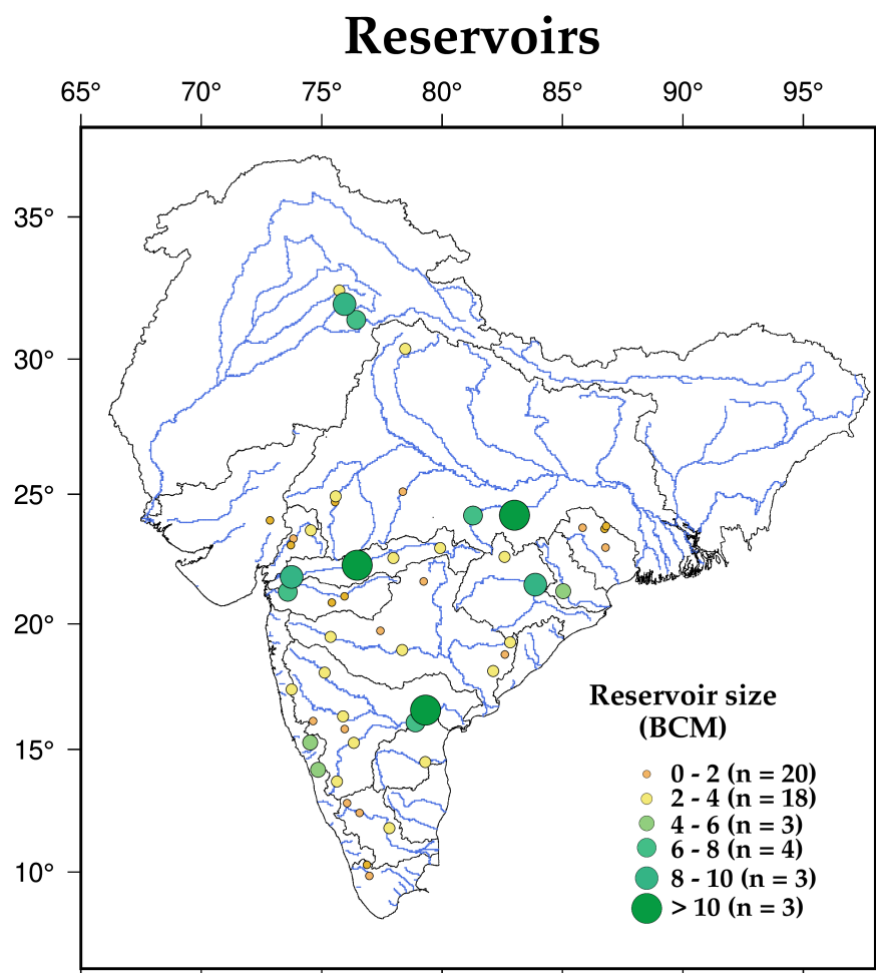

**Figure S1. Dams locations and storage capacity in Billion Cubic Meters (BCM)**

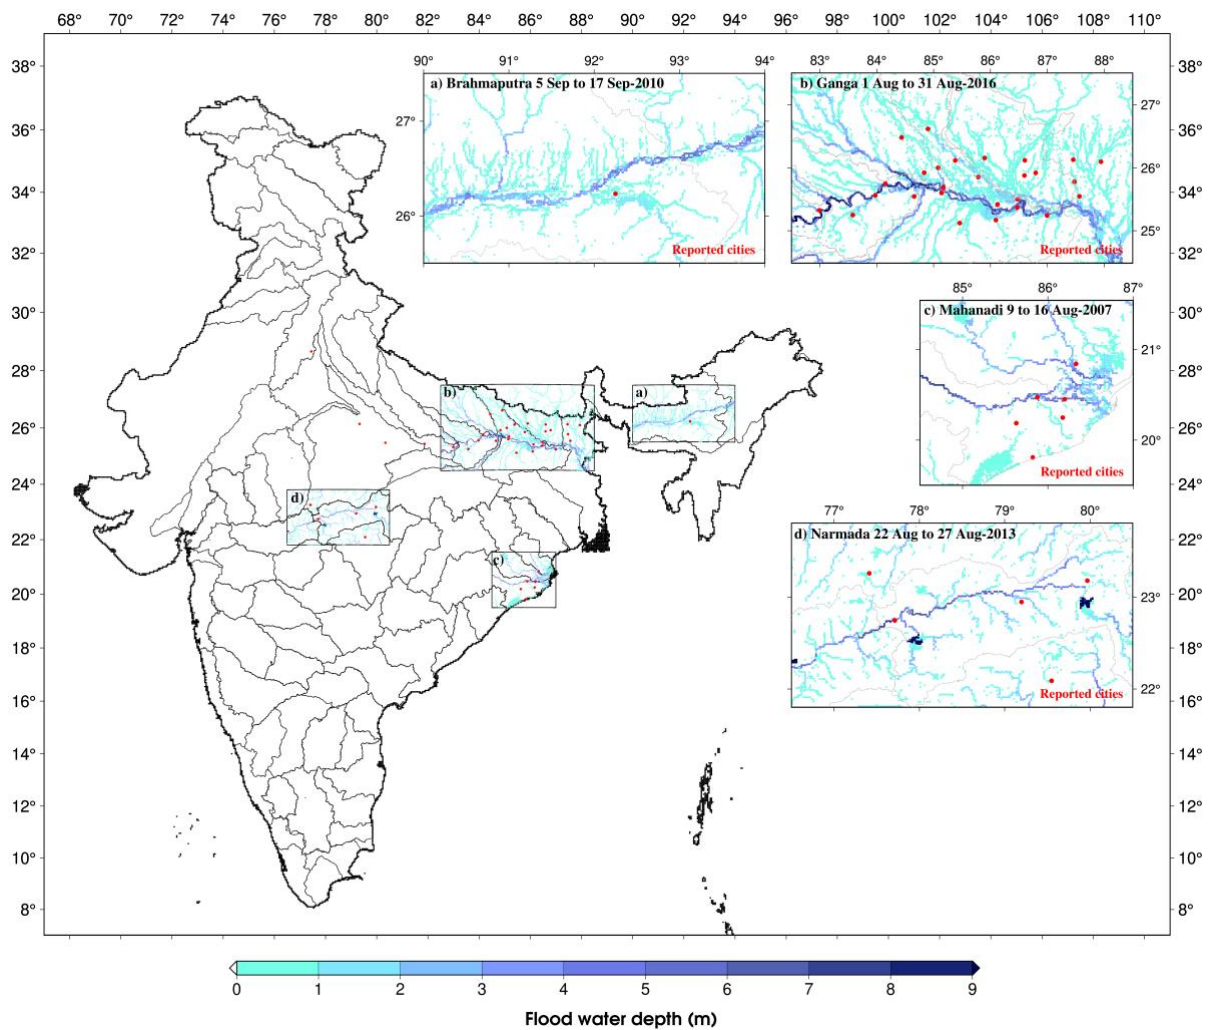

**Figure S2. Simulated flood occurrence compared with reported flood cities from EMDAT and/or DFO (a) Brahmaputra River basin 5 September 2010 to 17 September 2010 (b) Ganga River basin 1 August 2016 to 31 August 2016 (c) Mahanadi River basin 9 August 2007 to 16 August 2007 (d) Narmada River basin 22 August 2013 to 27 August 2013**

**Table S1 - Dams location, storage capacity and purpose details (Purpose Abbreviation: I-irrigation, H-hydropower, S-water supply, F-fish production, C-flood control, O-other benefits, T-tourism, N-navigation)**

| <b>Sr No</b> | <b>Basin</b> | <b>Dam</b>     | <b>Lat</b> | <b>Long</b> | <b>Total storage (BCM)</b> | <b>Live storage (BCM)</b> | <b>Purpose</b> |
|--------------|--------------|----------------|------------|-------------|----------------------------|---------------------------|----------------|
| 1            | Narmada      | Indira Sagar   | 22.2846    | 76.4721     | 12.22                      | 9.75                      | I/H            |
| 2            | Krishna      | Nagarjun Sagar | 16.5761    | 79.3135     | 11.55                      | 6.92                      | I/H            |
| 3            | Ganga        | Rihand         | 24.2028    | 83.0057     | 10.6                       | 8.9                       | I/H            |
| 4            | Indus        | Pong           | 31.9662    | 75.9456     | 9.621                      | 7.29                      | I/H/C          |
| 5            | Narmada      | Sardar Sarovar | 21.8305    | 73.7501     | 9.5                        | 5.8                       | I/H/N/S/C/F/O  |
| 6            | Mahanadi     | Hirakud        | 21.5338    | 83.8751     | 8.136                      | 5.818                     | I/H/S/D/T/C    |
| 7            | Indus        | Bhakra         | 31.4107    | 76.4331     | 7.551                      | 6.007                     | I/H/T/C/F      |
| 8            | Tapi         | Ukai           | 21.2504    | 73.5913     | 7.41429                    | 6.729896                  | I/H/C          |
| 9            | Ganga        | Bansagar       | 24.1902    | 81.2862     | 6.37                       | 5.43                      | I/H/S          |
| 10           | Krishna      | Srisaillam     | 16.0867    | 78.8971     | 6.116438863                | 5.833270398               | H              |
| 11           | Brahmani     | Rengali        | 21.2765    | 85.034      | 5.15                       | 3.41371                   | I/H/C          |
| 12           | West Coast   | Linganamakki   | 14.1756    | 74.8466     | 4.43535                    | 4.29394                   | H              |
| 13           | West Coast   | Supa           | 15.2759    | 74.5265     | 4.178                      | 4.115                     | H              |
| 14           | Narmada      | Bargi          | 22.9416    | 79.9236     | 3.92                       | 3.18                      | I/H/S          |
| 15           | Krishna      | Tungabhadra    | 15.2639    | 76.333      | 3.73782375                 | 3.308540356               | I/H/S/D/T/F    |

|    |                |                      |             |             |                 |                 |         |
|----|----------------|----------------------|-------------|-------------|-----------------|-----------------|---------|
| 16 | Godavari       | Balimela             | 18.141<br>1 | 82.121<br>5 | 3.61            | 2.6759          | I/H     |
| 17 | Ganga          | Tehri                | 30.37       | 78.47       | 3.54            | 2.615           | I/H     |
| 18 | Krishna        | Almatti              | 16.330<br>9 | 75.886<br>8 | 3.4852374<br>78 | 2.9854451<br>36 | I/H     |
| 19 | Mahanadi       | Bango                | 22.605<br>2 | 82.597<br>9 | 3.416           | 2.894           | I/H     |
| 20 | Krishna        | Ujjaini              | 18.074<br>3 | 75.119<br>8 | 3.32001         | 1.5172          | I/S     |
| 21 | Indus          | Thein                | 32.443<br>9 | 75.730<br>4 | 3.28            | 2.344           | I/H/C   |
| 22 | Godavari       | Sriram<br>Sagar      | 18.968<br>5 | 78.341<br>4 | 3.172           | 2.322           | I/H/S   |
| 23 | Krishna        | Koyna                | 17.402<br>6 | 73.750<br>8 | 2.98068         | 2.83554         | I/H     |
| 24 | Godavari       | Jayakwadi<br>Stage 1 | 19.484<br>9 | 75.370<br>5 | 2.909           | 2.17093         | I/H     |
| 25 | Ganga          | Ranapratap<br>Sagar  | 24.917<br>6 | 75.583<br>9 | 2.89869         | 1.56653         | I/H/S   |
| 26 | Cauvery        | Mettur               | 11.801<br>3 | 77.808<br>9 | 2.708764        | 2.647           | I/H/D/T |
| 27 | Narmada        | Tawa                 | 22.562<br>6 | 77.977      | 2.311542        | 1.943965        | I       |
| 28 | Godavari       | Upper<br>Indrawati   | 19.274<br>2 | 82.829<br>4 | 2.3             | 1.5             | I/H     |
| 29 | Pennar         | Somasila             | 14.489      | 79.304<br>6 | 2.20837         | 1.9941          | I/H     |
| 30 | Mahi           | Mahi                 | 23.628<br>5 | 74.547<br>1 | 2.180376        | 1.8335          | I/H/S/O |
| 31 | Krishna        | Bhadra               | 13.701<br>1 | 75.636<br>3 | 2.02587         | 1.785           | I/H/S   |
| 32 | South<br>Coast | Idukki               | 9.8429      | 76.976<br>1 | 1.9963          | 1.45951         | I/H/S/C |
| 33 | Mahi           | Kadana               | 23.305<br>7 | 73.825<br>3 | 1.542           | 1.203           | I/H/F   |
| 34 | Krishna        | Hidkal               | 16.142<br>5 | 74.642<br>5 | 1.44869         | 1.32183         | I/H/S   |

|    |              |                   |         |         |         |          |                   |
|----|--------------|-------------------|---------|---------|---------|----------|-------------------|
| 35 | Cauvery      | Krishnaraja Sagar | 12.4253 | 76.5723 | 1.4     | 1.27569  | I                 |
| 36 | Godavari     | Isapur            | 19.7271 | 77.4359 | 1.279   | 0.964    | I                 |
| 37 | Godavari     | Upper Kolab       | 18.7928 | 82.6079 | 1.215   | 0.935    | I/H/S             |
| 38 | Godavari     | Totladoh          | 21.6587 | 79.2319 | 1.16693 | 1.01693  | H                 |
| 39 | Ganga        | Matatila          | 25.0978 | 78.3728 | 1.132   | 1.0194   | I/H               |
| 40 | Krishna      | Malaprabha        | 15.8166 | 75.9533 | 1.068   | 0.83025  | I/H/N/S/D/T/C/F/O |
| 41 | Cauvery      | Hemavathy         | 12.8219 | 76.0544 | 1.05063 | 1.01261  | I/H/S/D/T/F/O     |
| 42 | Subernarekha | Kangsabati        | 22.9636 | 86.789  | 1.04    | 0.9004   | I                 |
| 43 | Subernarekha | Tenughat          | 23.7252 | 85.8361 | 1.0209  | 0.99992  | I/H               |
| 44 | Sabarmati    | Dharoi            | 24.0045 | 72.8539 | 0.90788 | 0.13199  | I/S               |
| 45 | Mahi         | Panam             | 23.0542 | 73.7167 | 0.7376  | 0.69884  | I/H/S/F           |
| 46 | Tapi         | Girna             | 20.8329 | 75.4237 | 0.60845 | 0.52355  | I/H               |
| 47 | Subernarekha | Maithon           | 23.7851 | 86.8119 | 0.534   | 0.441    | I/H/S/T/C         |
| 48 | Tapi         | Hatnur            | 21.0735 | 75.9454 | 0.388   | 0.255    | I                 |
| 49 | Subernarekha | Panchet           | 23.6808 | 86.7471 | 0.275   | 0.169    | I/H/S/C           |
| 50 | South Coast  | Sholayar          | 10.2979 | 76.8804 | 0.16    | 0.1525   | I/H               |
| 51 | Ganga        | Gandhisagar       | 24.7008 | 75.5523 | 0.07322 | 0.067974 | I/H               |
